# Supplementary material for: Motexafin gadolinium reacts with ascorbate to produce reactive oxygen species
Source: Royal Society of Chemistry journal article supplement (doi:10.1039/b208760j), 2002-10-21
Supplement: b208760j.doc [file b208760j.doc]

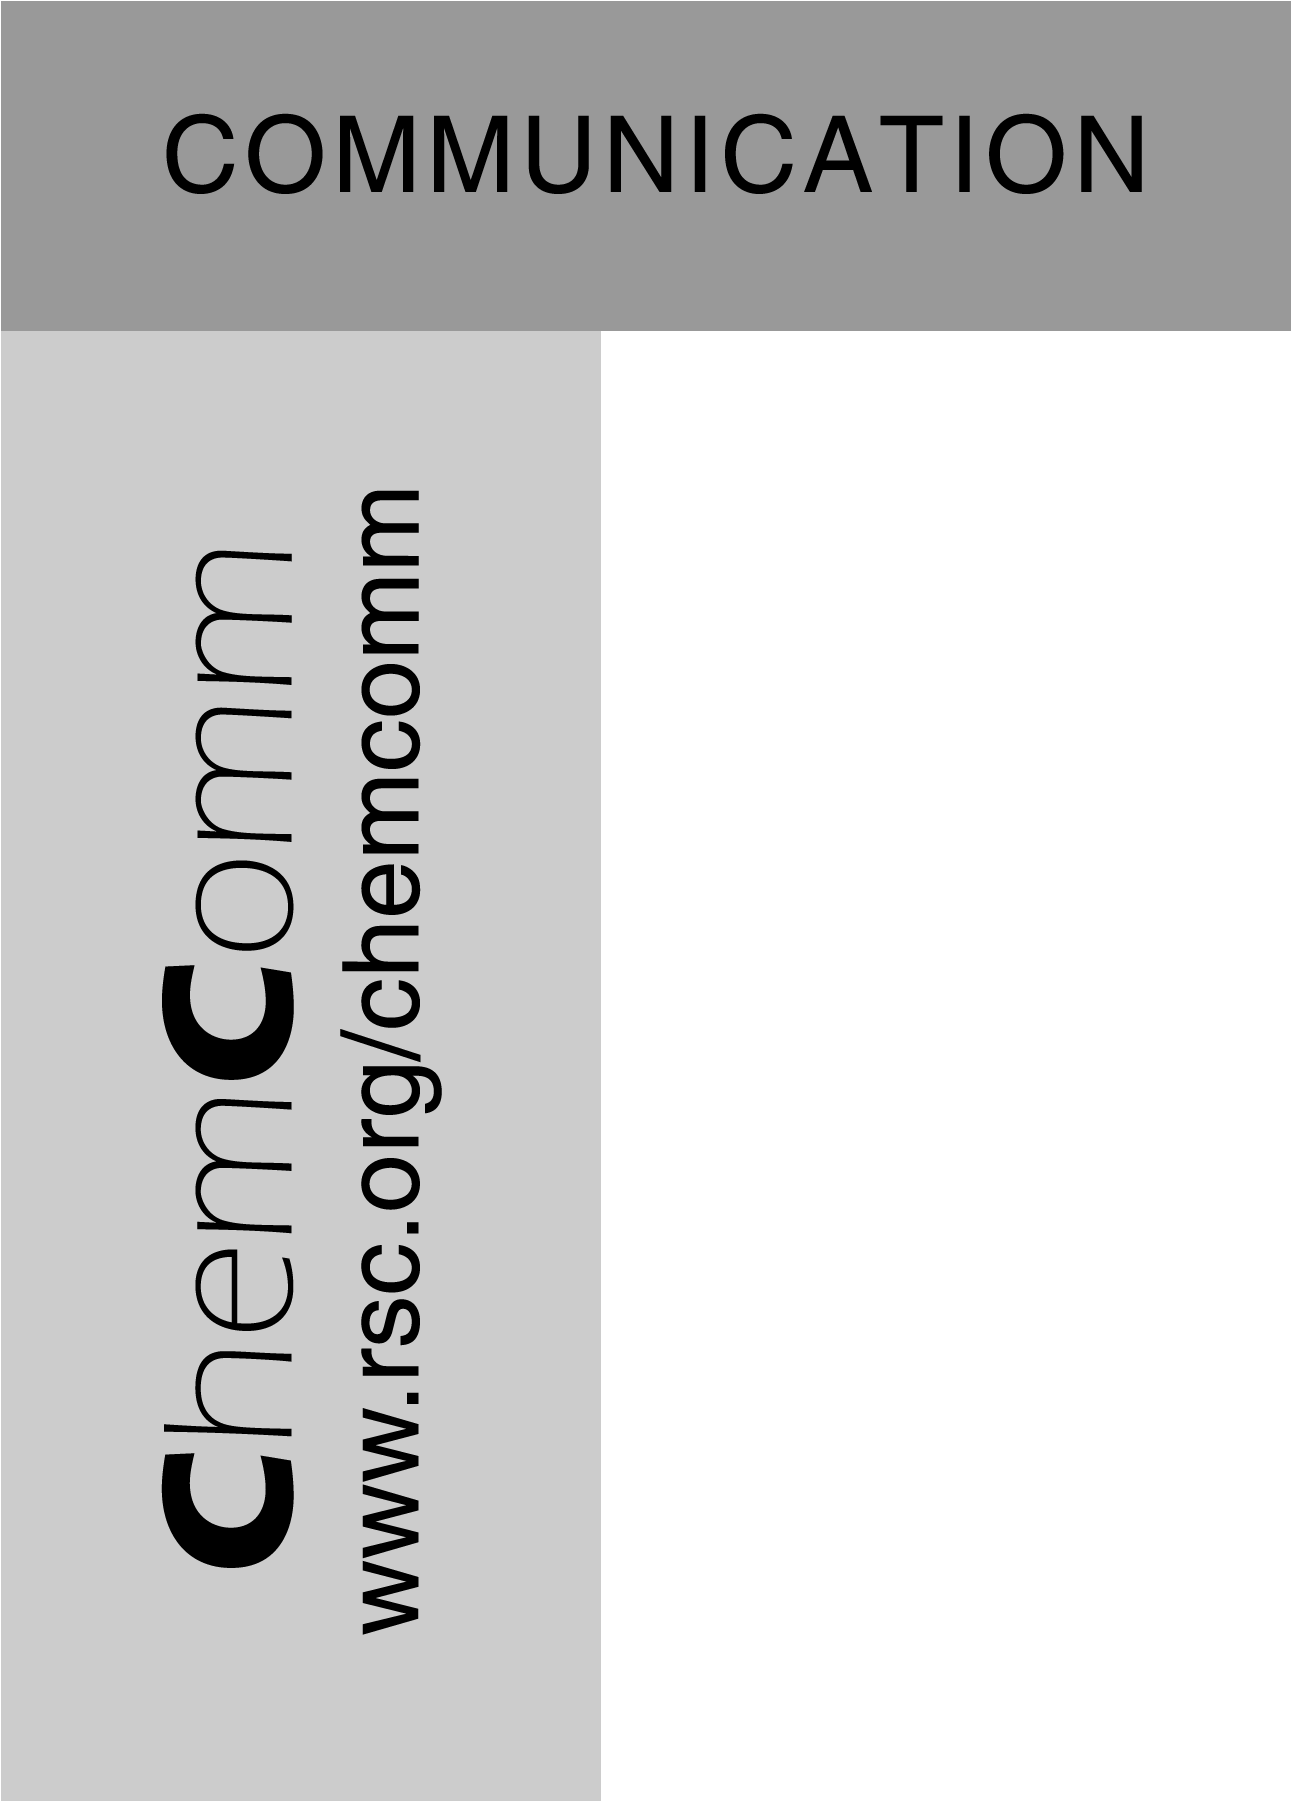
Supplementary Information for “Motexafin gadolinium reacts with ascorbate to produce reactive oxygen species”

Darren Magda,**a* Nikolay Gerasimchuk,*a* Philip Lecane,*a* Richard A. Miller,*a* John E. Biaglow,*b* and Jonathan L. Sessler*c*

aPharmacyclics, Inc., 995 E. Arques Avenue, Sunnyvale, CA 94085, USA. Fax: 408 774 0340; Tel: 408-774-0330 E-mail: dmagda@pcyc.com

b[Department of Radiation Oncology, University of Pennsylvania, Philadelphia, PA 19104](mailto:xxxx@aaa.bbb.ccc)

cDepartment of Chemistry and Biochemistry, University of Texas at Austin, Austin, TX 78712

**Effect of oxygen on the rate of ascorbate oxidation in the presence of MGd.**

A solution of ascorbic acid (1.25 mM) in 50 mM HEPES buffer, pH 7.5, 100 mM NaCl (all concentrations final) was placed in a 1 mm quartz cuvette. The UV-visible spectrum of this solution was recorded following addition of a solution of MGd in ACS grade water (62 M final, 0.05 eq.). Oxygen was dispersed through the cuvette for 5 minutes prior to addition of MGd. The rate of ascorbate oxidation was monitored by measurement of the change in absorbance at 266 nm (every 5 minutes) using a Hitachi Model U-3000 instrument (Figure 1, Cf., also, Figures 1A and 1B in text). Buffer was treated with Chelex 100™ (BioRad) prior to use, to remove endogenous transition metal cation contaminants.

Effect of catalase and superoxide dismutase on the rates of ascorbate, MGd, and oxygen decrease.

Using solution conditions identical to those above, further studies were conducted to provide the data shown in Table 1 in the text. Superoxide dismutase [EC 1.15.1.1] (100 units/mL) or catalase [EC 1.11.1.6] (2600 units/mL) was added prior to MGd. Enzymes were obtained from Roche Molecular Biochemicals. The rate of absorbance change was monitored at 266 nm (ascorbate) and 470 nm (MGd) every 30 seconds using a Hewlett-Packard Model 8453 instrument. In addition, a ruthenium bipyridine-tipped fiber optic probe (Ocean Optics) was inserted into the 2 mm cuvette (sealed with a septum) prior to the reaction in order to monitor the oxygen tension every 30 seconds. The oxygen probe was calibrated using an aqueous solution of sodium sulfite (no oxygen) and a Clark-type electrode (ambient oxygen) prior to the measurements. Data from the first 20 minutes were used to calculate the (linear) initial rate of ascorbate decay (Figure 2). Data at 470 nm were fit to the equation y = a + b exp(-x/c), and the first derivative was used to calculate the initial rate of decrease in MGd absorbance (Figure 3). Data from 5-25 minutes were used to calculate the (linear) initial rate of oxygen consumption (Figure 4). Data from the first 5 minutes were not used, in order to avoid the transient change in probe fluorescence immediately following addition of MGd and mixing.

**Figure 2, Supplementary Information**  Effect of antioxidant enzymes on the rate of ascorbate oxidation in the presence of MGd.

**Figure 1, Supplementary Information** Effect of oxygen on the rate of ascorbate oxidation in the presence of MGd.

Reaction of MGd with dehydroascorbic acid (DHA) in buffered solution.

To a solution of MGd **1** (50 mg, 43.6 mol) in ACS grade water (20 mL) was added a suspension of dehydroascorbic acid (15.3 mg, 87.9 mol) in buffer (10 mL, 200 mM HEPES, pH 7.5, 400 mM NaCl). An aliquot was removed for UV-vis analysis (T = ca. 2 minutes) whereupon the mixture was heated at 50 oC for 70 minutes. Aliquots removed periodically for UV-vis analysis appeared to indicate that no further spectral changes were occurring after this time. Therefore, an additional amount of DHA was added (15.3 mg, 87.9 mol) and the mixture incubated at 50 oC overnight. The UV-vis spectrum of a sample taken the following day (1045 minutes) appeared to indicate complete conversion to the new species, as evidenced by the complete conversion of the Q-like absorbance band from 740 nm to 780 nm (Figure 5). Within several hours upon cooling to ambient temperature, a very fine dark-brown precipitate was observed in the reaction flask. This precipitate (**2**) was isolated by centrifugation at 10 oC and 15,000 r.p.m. for 25 min and removal of supernatent. The pellet was resuspended and centrifuged with ACS grade water five times to remove salts and other impurities, and then dried under vacuum at 50 oC for 4 days. Anal. Calcd for [C48H66N5O10Gd](C2O4)(H2O): C, 52.85; H, 6.03; N, 6.16. Found: C, 52.47; H, 6.01; N, 5.65.

Reaction of MGd with disodium oxalate.

**Figure 3, Supplementary Information** Effect of antioxidant enzymes on the rate of MGd absorbance decrease.

**Figure 4, Supplementary Information** Effect of antioxidant enzymes on the rate of oxygen consumption in the presence of MGd.

MGd (200 mg, 174 mol) was placed into 250 mL Erlenmeyer flask and dissolved in ACS grade water (50 mL) and 4X HEPES buffer (20 mL, 400 mM NaCl, 200 mM HEPES, pH 7.5). Disodium oxalate (233 mg, 1.74 mmol) was dissolved in ACS grade water (10 mL) in a vial, and then added dropwise over 5 min to the above solution of MGd. The reaction mixture, which immediately changed color from olive to brown, was allowed to stir for 1 h. The resulting suspension was divided into 4 polypropylene tubes and centrifuged at 15,000 r.p.m. for 2 h. The pellet was resuspended and centrifuged with ACS grade water five times to remove salts and other impurities, and then dried under vacuum at 50 oC for 4 d to provide the oxalate complex of MGd 2 as a brown-green powder (70 mg). The UV-visible absorbance spectrum indicated complete conversion of the Q-like absorbance band from 740 nm to 780 nm. The IR spectrum (KBr) showed loss of the absorbance at 1588 cm-1 (acetate) and appearance of a new absorbance at 1650 cm-1 (oxalate). This procedure was repeated using oxalic-13C2 acid dihydrate (Aldrich) in buffer. The 13C nmr spectrum on the resulting material contained a single (major) resonance at  213.6 (singlet).

**Figure 5 Supplementary Information** Reaction of MGd with DHA.

Analysis of A549 Human Lung Carcinoma Cells by Flow Cytometry.

A549 human lung cancer cells were treated with MGd **1** (50 M), ascorbate (50 or 100 M), or MGd oxalate compound **2** (10 or 50 M) in RPMI 1640 medium/10% dialyzed fetal bovine serum. L-Buthionine-[S,R]-sulfoximine (100 M) was also added where indicated. After 22 h, cultures were washed with Dulbecco’s phosphate buffered saline (PBS), and treated with dichlorofluorescin acetate in Hank’s sterile saline for 10 minutes (0.25 g/mL). Cultures were washed with PBS, treated with trypsin, resuspended in PBS, and subjected to analysis by flow cytometry as described in the text (Figure 3). Mean fluorescence at 530 nm (DCF) and >650 nm (MGd) is shown. Complete data from this experiment, including all control groups, are shown below in Figure 6. Error bars indicate standard deviation (n=3).

Product analysis for the reaction of oxidation of ascorbic acid in the presence of MGd.

It is well established that ascorbic acid undergoes stepwise oxidation in aqueous solutions leading to threonic acid and oxalic acid.1 Since we were investigating the catalytic effect of motexafin gadolinium on the above reaction, it was important to determine the amount of both threonic and oxalic acids produced as the result of ascorbate oxidation under the conditions used in our studies. For the purpose of this analysis, an ion chromatography method was employed. This method allows quantitative determination of the anions formed in the reaction.

An ion chromatograph DX 500 equipped with a conductivity detector was used for the studies. The mobile phase was 40 mM KOH, used at a flow rate of 0.5 mL/min and a column temperature of 35 oC. Values of retention time for threonate and oxalate at these conditions are 2.1 min and 5.6 min respectively. Calibration curves were obtained using stock solutions of sodium oxalate (Na2C2O4, Aldrich Chemical 37,973-5), 9.80 mg in 10 mL ACS grade water (FW 130.0; 7.31 mM), and calcium L-threonate (CaC8H16O10, Aldrich Chemical 38,064-4), 10.40 mg/10 mL ACS grade water (FW 310.28, 3.35 mM). Solutions for calibration were prepared by further dilution of the above stock solutions in ACS grade water. An injection volume of 5 L was used in all injections. Calibration curves were prepared for each anion using the data in Table 1.

A solution of ascorbic acid (1.25 mM) in 50 mM HEPES buffer, pH 7.5, 100 mM NaCl (all concentrations final) was placed in a 6 mL polypropylene screw cap vial. Oxygen was dispersed through the cuvette for 5 minutes prior to addition of MGd. The excess of gaseous O2 in the tube was necessary to ensure complete oxidation of ascorbic acid in the presence of MGd (Cf., Figure 1 in text). The UV-visible spectrum in the range 190-1100 nm of this solution was immediately recorded, with an absorbance A=1.42 at 266 nm observed. MGd in ACS grade water (62 M final, 0.05 eq.) was then added. A second UV-visible spectrum that was recorded after 60 minutes showed no ascorbate absorbance at 266 nm. The resulting reaction mixture was analyzed using ion chromatography.

**Table 1** Calibration data for ion chromatography.

| Oxalate | | Threonate | |
| --- | --- | --- | --- |
| IC Peak Area | Conc. (mM) | IC Peak Area | Conc. (mM) |
| 0 | 0 | 0 | 0 |
| 6223569 | 0.358 | 2401534 | 0.168 |
| 11491726 | 0.716 | 4172932 | 0.335 |
| 50541315 | 3.58 | 14491678 | 1.68 |

Injection of 5 L of sample resulted in three peaks on the ion chromatogram. The smallest peak was identified as acetate, deriving from the MGd complex catalyst **1**. The other two peaks eluted at the same retention times as threonate and oxalate standards. The threonate peak had an area of 6148437 relative units (0.55 mM), whereas the oxalate peak had an area of 11699802 relative units (0.74 mM). These data indicate that, within a ca. 25% error, the products of ascorbate oxidation include equimolar amounts of oxalate and threonate, in ca. 50% overall yield. The lower than theoretical (1.25 mM) amount of these compounds may possibly be attributed to their further oxidation (to carbon dioxide and non-anionic species) under the experimental conditions.

**Figure 6, Supplementary Information** Flow cytometry analysis of A549 lung cancer cells.

1 G. Banhegyi, L. Braun, M. Csala, F. Puskas, and J. Mandl, *Free Radical Biology & Medicine*, 1997, **5**, 793-803 and references therein.
